# Supplementary material
Source: publisher site journal article supplement (https://www.dovepress.com/article/528020)
Supplement: Supplementary file 1 [file 528020%20Supplementary%20file.docx]

Supplementary Table 1: Comparison of General Information of All Patients with T2DM

|  | Normoalbuminuria group  n=50 | Microalbuminuria group  n=25 | Macroalbuminuria group  n=12 | P value |
| --- | --- | --- | --- | --- |
| Age,years | 69.00(62.75,73.00) | 68.00(65.50,72.50) | 64.00(63.00,69.75) | 0.374 |
| Male,n% | 18（36.00%） | 15（60.00%） | 11（91.70%）a | 0.000 |
| BMI,kg/m2 | 23.81±2.58 | 24.02±2.80 | 23.99±2.04 | 0.940 |
| Obesity,n% | 24（48.00%） | 12（48.00%） | 5（41.70%） | 0.920 |
| SBP,mmHg | 131.20±14.73 | 138.40±17.48 | 141.33±14.09 | 0.051 |
| DBP,mmHg | 76.00(68.00,82.50) | 75.00(69.00,85.50) | 80.00(69.50,81.75) | 0.676 |
| Hypertension,n% | 37（74.00%） | 21（84.00%） | 11（91.70%） | 0.315 |
| Smoking,n% | 5（10.00%） | 4（16.00%） | 6（50.00%）a | 0.004 |
| CRP,mg/L | 0.90(0.80,1.89) | 2.05(0.80,2.86) | 1.51(0.80,4.37) | 0.083 |
| DM duration,years | 17.00(10.00,20.00) | 20.00(10.00,20.00) | 10.00(10.00,20.00) | 0.885 |
| White blood cell count,109/L | 5.85(4.98,7.20) | 6.60(4.95,7.25) | 6.35(5.18,6.93) | 0.647 |
| Platelet count,1012/L | 203.00±49.82 | 207.92±51.35 | 171.00±43.38 | 0.090 |
| Percentage of lymphocytes,% | 31.18±10.54 | 28.66±7.43 | 22.70±7.63a | 0.021 |
| Percentage of monocytes,% | 59.36±10.69 | 62.65±7.83 | 67.64±7.64a | 0.024 |
| Hemoglobin,g/L | 130.56±15.25 | 123.28±14.37 | 119.75±23.94 | 0.056 |
| RDW,% | 13.00(12.68,13.50) | 12.80(12.40,13.30) | 13.15(12.65,13.80) | 0.233 |
| Glycated hemoglobin,% | 7.85(6.80,9.23) | 8.20(6.95,9.10) | 6.70(5.90,8.20)ab | 0.030 |
| 25-(OH)D,ng/ml | 17.95(12.08,24.23) | 12.80(09.65,17.30)a | 12.76(09.00,17.55)a | 0.011 |
| Seralbumin,g/L | 41.77±2.79 | 39.56±3.67a | 36.59±6.11a | 0.005 |
| Urea nitrogen,mmol/L | 5.65(04.50,8.10) | 7.80(05.30,10.05)a | 7.30(05.43,11.22)a | 0.032 |
| eGFR,ml/min/1.73m2 | 90.00(67.00,96.25) | 66.00(33.00,93.00)a | 50.00(35.25,84.50)a | 0.003 |
| eGFR＜60,n% | 8(16.00%) | 12(48.00%)a | 7(58.30%)a | 0.002 |
| Serum creatinine,umol/L | 64.55(52.23,90.10) | 88.00(63.30,146.35)a | 114.80(84.23,162.25)a | 0.000 |
| Uric acid,umol/L | 292.02±69.61 | 333.44±101.47 | 379.66±65.73a | 0.001 |
| HDL,mmol/L | 1.29(1.02,1.61) | 1.07(0.99,1.31) | 1.05(0.73,1.39) | 0.094 |
| LDL,mmol/L | 2.53(2.01,3.04) | 2.51(2.22,2.70) | 2.24(1.28,3.14) | 0.630 |
| Fasting insulin,uIU/L | 11.25(7.13,17.82) | 14.65(7.05,15.35) | 9.74(7.48,11.78) | 0.443 |
| Fasting C-peptide,ng/ml | 1.94(1.30,2.73) | 2.72(1.30,3.75) | 3.02(1.68,3.04)a | 0.024 |
| Fasting blood glucose,mmol/L | 6.25(5.28,7.83) | 5.80(4.80,8.30) | 6.15(4.50,7.70) | 0.915 |
| Triglyceride,mmol/L | 1.28(1.01,1.52) | 1.58(1.03,2.17) | 1.28(0.85,1.91) | 0.338 |
| Cholesterol,mmol/L | 4.43±1.03 | 4.26±0.82 | 3.85±1.26 | 0.203 |
| HOMA-IR | 2.99(1.91,5.34) | 3.15(1.77,5.67) | 2.44(1.49,3.33) | 0.338 |
| Tyg | 8.77±0.63 | 8.97±0.70 | 8.73±0.61 | 0.396 |
| NLR | 1.89(01.41,2.56) | 2.32(01.79,2.85) | 2.73(02.15,4.95)a | 0.019 |
| SII | 364.68(245.49,631.35) | 457.84(343.54,571.33) | 476.75(310.21,899.39) | 0.250 |
| SIRI | 0.63(00.41,1.27) | 0.76(00.55,1.24) | 0.85(00.70,1.79) | 0.090 |
| RPP | 9553.50(8563.50,11523.50) | 10008.00(8559.00,11104.00) | 10887.00(8512.00,12157.50) | 0.464 |

Note: a. compared with the normoalbuminuria group, P < 0.05; b. compared with the macroalbuminuria group, P < 0.05. Data are presented as mean ± standard deviation for normally distributed data and median (interquartile range) for non-normally distributed data, or n (%). SBP, systolic blood pressure; DBP, diastolic blood pressure; CRP, C-reactive protein; RDW, Red blood cell distribution width; eGFR, Estimated glomerular filtration rate; HDL, High-density lipoprotein; LDL, Low-density lipoprotein; Tyg, triglyceride glucose index; PLR, platelet-lymphocyte ratio; NLR, neutrophil-lymphocyte ratio; SII, Systemic Immunoinflammatory Index; SIRI, Systemic Inflammatory Response Index; RPP, rate-pressure product.

Supplementary Table 2: Comparison of Conventional Echocardiographic Data in All Patients with DM

|  | Normoalbuminuria group  n=50 | Microalbuminuria group  n=25 | Macroalbuminuria group  n=12 | P value |
| --- | --- | --- | --- | --- |
| LAD,mm | 36.64±4.07 | 36.88±3.87 | 41.08±7.18 | 0.145 |
| LVEDd,mm | 44.46±4.09 | 44.64±4.73 | 47.00±5.38 | 0.206 |
| LVESd,mm | 28.00(25.00,30.25) | 27.00(24.50,31.00) | 29.00(26.50,32.25) | 0.512 |
| IVST,mm | 9.00(8.00,10.00) | 9.00(8.50,10.00) | 10.00(9.00,10.00) | 0.524 |
| LVPWT,mm | 9.00(8.00,9.00) | 9.00(8.00,9.00) | 9.50(9.00,10.00) | 0.066 |
| LVEF ,% | 65.10±3.14 | 63.44±3.19 | 64.58±3.09 | 0.105 |
| LVMI,g/m2 | 78.00±16.29 | 78.32±19.42 | 87.84±23.62 | 0.237 |
| SV,ml | 51.78±14.94 | 53.64±16.64 | 67.83±22.84ab | 0.013 |
| LVEDV,ml | 79.60±23.13 | 84.32±25.73 | 103.25±30.43ab | 0.016 |
| HR ,bpm | 75.26±12.58 | 74.72±13.59 | 76.75±14.97 | 0.908 |
| E | 65.00(54.75,78.00) | 65.00(55.00,78.50) | 68.50(58.75,84.25) | 0.814 |
| A | 93.32±16.26 | 97.68±17.06 | 102.82±25.86 | 0.225 |
| E/A | 0.67(0.59,0.84) | 0.70(0.55,0.83) | 0.65(0.58,0.85) | 0.838 |
| E/A≤0.8,n% | 36（72.00%) | 18(72.00%) | 8(66.67%) | 0.931 |
| IVRT,ms | 87.68±16.78 | 94.08±18.11 | 82.25±20.28 | 0.136 |
| E/e’ | 9.71(7.66,11.43) | 10.14(8.41,11.94) | 9.25(8.06,10.85) | 0.695 |
| E/e’＞14,n% | 4(8.00%) | 2(8.00%) | 2(16.67%) | 0.628 |
| Fractional shortening,% | 0.36(0.34,0.40) | 0.37(0.35,0.40) | 0.37(0.34,0.40) | 0.941 |

Note: a. compared with the normoalbuminuria group, P < 0.05; b. compared with the macroalbuminuria group, P < 0.05. LAD, Left atrial diameter; LVEDdm, Left ventricular end-diastolic diameter; LVESd, Left ventricular end-stage systole diameter; IVST, Interventricular septum thickness; LVPWT, Left ventricular posterior wall thickness; LVEF, Left ventricular ejection fraction; LVMI, Left ventricular mass index; SV, Stroke volume; LVEDV, Left ventricular end-diastolic volume; HR, heart rate; E, peak early diastolic mitral flow velocity; A, peak late diastolic mitral flow velocity; e’, spectral pulsed-wave Doppler-derived early diastolic; IVRT, Isovolumic relaxation time;

Supplementary Table 3: Comparison of Two-dimensional Speckle-tracking Echocardiographic Data in All Patients with DM

|  | Normoalbuminuria group  n=50 | Microalbuminuria group  n=25 | Macroalbuminuria group  n=12 | P value |
| --- | --- | --- | --- | --- |
| GLS,% | 18.18±2.29 | 16.18±1.95a | 15.19±2.37a | ＜0.001 |
| Patients with GLS < 18%,n% | 21 (42.00%) | 19(76.00%)a | 11(91.70%)a | ＜0.001 |

Note: a. compared with the normoalbuminuria group, P < 0.05; GLS, global longitudinal strain.

Supplementary Table 4: Multivariate Logistic Regression Analysis of the Development of Subclinical Left Ventricular Systolic Insufficiency in Patients with DM

| GLS＜18% | Multivariate(model 1) | | Multivariate(model 2) | |
| --- | --- | --- | --- | --- |
| OR（95%CI） | p | OR（95%CI） | p |
| Age,years | 0.913(0.811-1.028) | 0.134 | 1.224(0.878-1.708) | 0.233 |
| Male,n% | 2.117(0.519-8.632) | 0.296 | 13.317(0.556-318.704) | 0.11 |
| Obesity,n% | 1.117(0.339-3.683) | 0.856 | 0.108(0.002-5.668) | 0.271 |
| Smoking,n% | 2.197(0.335-14.387) | 0.412 | 1.751(0.028-110.452) | 0.791 |
| Albuminuria,n% | 4.063(1.149-14.369) | 0.030 | 18.750(0.245-1433.099) | 0.185 |
| DM duration,years | 1.058(0.978-1.145) | 0.162 | 0.941(0.800-1.107) | 0.464 |
| eGFR,ml/min/1.73m2 | 0.974(0.949-1.000) | 0.049 | 0.991(0.941-1.045) | 0.749 |
| HDL,mmol/L | 0.655(0.102-4.214) | 0.656 | 25.679(0.090-7361.993) | 0.261 |
| Triglyceride,mmol/L | 3.069(1.002-9.395) | 0.050 | 3.128(0.278-35.234) | 0.356 |
| HOMA-IR | 1.249(1.027-1.521) | 0.026 | 2.982(0.690-12.890) | 0.144 |

Note: CRP, C-reactive protein; HDL, High-density lipoprotein; LDL, Low-density lipoprotein; PLR, platelet-lymphocyte ratio; SII, Systemic Immunoinflammatory Index; SIRI, Systemic Inflammatory Response Index; OR, odds ratio; CI, confidence interval.
